# Supplementary material
Source: publisher site journal article supplement (https://www.spandidos-publications.com/4470/downloadSupplementary)
Supplement: Supplementary file 1 [file downloadSupplementary]

## Sheet: Table S5- SKCM
Table SV. CDR3 amino acid chemical sequence motifs representing survival distinctions for the eight cancer datasets in article Table 1 (SKCM).
Receptor	Sample	substring	km_p_os	median_substring_os	median_no_substring_os	n_substring_os	n_no_substring_os
TRB	01|06	HHXX	0.00787033	202.5	72.01	52	180
TRB	01|06	HXXN	0.00787154	268.53	72.01	67	165
TRA	01|06	XXXXA	0.0270723	216.49	81.14	65	196
TRA	01|06	XXHP	0.0278286	174.7	92.94	53	208
TRB	01|06	HXXXX	0.0308967	127.1	69.02	110	122
TRA	01|06	XXAX	0.038704	131.41	71.75	100	161
TRA	01|06	XXAXP	0.0424807	161.96	81.14	55	206
TRB	01|06	XXXX	0.0457396	117.08	66.62	136	96
TRA	01|06	XXXAX	0.047294	161.96	92.94	60	201

## Sheet: Table S6- BRCA
Table SVI. CDR3 amino acid chemical sequence motifs representing survival distinctions for the eight cancer datasets in article Table 1 (BRCA).
Receptor	Sample	substring	km_p_os	median_substring_os	median_no_substring_os	n_substring_os	n_no_substring_os
TRA	01|06	XHXXX	0.0106265	244.91	114.06	216	443
TRA	01|06	NXXA	0.0124784	inf	114.06	116	543
TRA	01|06	XXAX	0.0142098	244.91	107.16	308	351
TRA	01|06	HPHXX	0.0163428	91.92	129.6	50	609
TRA	01|06	XXPP	0.0278665	inf	114.06	92	567
TRA	01|06	XXHX	0.0314283	127.23	107.16	356	303
TRA	01|06	HHPN	0.039531	244.91	122.73	128	531
TRA	01|06	XXAXX	0.041552	244.91	113.7	138	521
TRB	01|06	XHXXXX	0.0472205	94.15	216.59	73	421

## Sheet: Table S7- STAD
Table SVII. CDR3 amino acid chemical sequence motifs representing survival distinctions for the eight cancer datasets in article Table 1 (STAD). These data represent 100% of the analysis output with no p-values less than 0.05.
Receptor	Sample	substring	km_p_os	median_substring_os	median_no_substring_os	n_substring_os	n_no_substring_os
TRA	01|06	XXXXX	0.0574356	46.22	21.42	71	82
TRB	01|06	XXXXX	0.0886199	68.99	21.42	51	79
TRA	01|06	XXXX	0.372898	42.51	21.98	108	45
TRB	01|06	HXXH	0.383315	21.42	42.51	60	70
TRB	01|06	HXXX	0.413442	42.51	28.94	95	35
TRB	01|06	XXHX	0.563804	42.51	28.94	66	64
TRB	01|06	XXXX	0.572802	68.99	37.88	79	51
TRA	01|06	XXXP	0.581975	25.69	42.51	51	102
TRA	01|06	HXXX	0.602922	28.71	42.51	82	71
TRB	01|06	XHXX	0.630921	37.88	68.99	57	73
TRA	01|06	AXXX	0.639058	68.99	35.97	53	100
TRA	01|06	XXXH	0.65295	35.97	46.22	60	93
TRA	01|06	XHXX	0.666219	46.22	37.88	67	86
TRA	01|06	HHXX	0.673611	inf	37.88	73	80
TRA	01|06	XXXA	0.705143	25.69	37.88	59	94
TRA	01|06	XXHX	0.753945	35.97	42.51	68	85
TRA	01|06	HXXXX	0.814511	35.97	42.51	64	89
TRB	01|06	HXXXX	0.967338	68.99	37.88	62	68

## Sheet: Table S8- LUAD
Table SVIII. CDR3 amino acid chemical sequence motifs representing survival distinctions for the eight cancer datasets in article Table 1 (LUAD).
Receptor	Sample	substring	km_p_os	median_substring_os	median_no_substring_os	n_substring_os	n_no_substring_os
TRB	01|06	HXXXX	0.00115076	85.97	41.56	163	177
TRB	01|06	HXXXXX	0.0037263	85.97	44.58	110	230
TRB	01|06	XXHX	0.00412625	58.8	39.91	177	163
TRB	01|06	XXXXX	0.0043813	85.97	44.58	136	204
TRB	01|06	XXXXH	0.00736033	inf	45.3	60	280
TRB	01|06	XXXXXX	0.00881347	85.97	44.58	92	248
TRB	01|06	XXXX	0.0321135	54.3	44.58	210	130

## Sheet: Table S9- LUSC
Table SIX. CDR3 amino acid chemical sequence motifs representing survival distinctions for the eight cancer datasets in article Table 1 (LUSC).
Receptor	Sample	substring	km_p_os	median_substring_os	median_no_substring_os	n_substring_os	n_no_substring_os
TRA	01|06	XXXXAX	0.00458526	86.24	43.96	50	292
TRA	01|06	XXXAX	0.00624134	86.24	43.86	74	268
TRB	01|06	XXXA	0.00901108	34.33	60.48	61	220
TRA	01|06	XXXAXP	0.0128563	86.24	43.96	61	281
TRA	01|06	XXAXP	0.0233697	64.16	43.96	71	271
TRA	01|06	HXAX	0.0358701	inf	46.85	52	290
TRB	01|06	XXNX	0.0397245	30.45	55.16	80	201
TRA	01|06	XAXP	0.0487991	64.16	43.96	85	257

## Sheet: Table S10-  UCEC
Table SX. CDR3 amino acid chemical sequence motifs representing survival distinctions for the eight cancer datasets in article Table 1 (UCEC).
Receptor	Sample	substring	km_p_os	median_substring_os	median_no_substring_os	n_substring_os	n_no_substring_os
TRA	01|06	HHPX	0.00716068	106.8	inf	54	272

## Sheet: Table S11- HNSC
Table SXI. CDR3 amino acid chemical sequence motifs representing survival distinctions for the eight cancer datasets in article Table 1 (HNSC). These data represent 100% of the analysis output with no p-values less than 0.05.
Receptor	Sample	substring	km_p_os	median_substring_os	median_no_substring_os	n_substring_os	n_no_substring_os
TRB	01|06	XHXH	0.0880129	100.49	52.27	59	275
TRA	01|06	NXXXX	0.0925059	67.81	54.89	56	306
TRA	01|06	PXXXXX	0.0932065	65.77	54.89	53	309
TRB	01|06	XNXX	0.101348	88.8	52.27	62	272
TRA	01|06	XAXP	0.11595	88.8	53.91	86	276
TRA	01|06	XHXP	0.121071	88.8	53.91	80	282
TRB	01|06	XXXXN	0.121885	54.89	52.27	95	239
TRB	01|06	XXHN	0.132404	47.93	57.88	54	280
TRA	01|06	XXHXP	0.140358	88.8	53.91	73	289
TRB	01|06	XXXN	0.140625	68.43	45.93	162	172
TRB	01|06	HXXP	0.146296	60.38	52.27	63	271
TRA	01|06	XXXXXX	0.164399	89.26	52.27	118	244
TRB	01|06	XAXX	0.180526	57.88	53.91	63	271
TRA	01|06	XXXP	0.19737	65.77	52.27	128	234
TRA	01|06	HHPN	0.201762	inf	54.89	54	308
TRA	01|06	HHHX	0.204221	88.8	52.27	104	258
TRB	01|06	XXXXX	0.204614	57.88	52.27	136	198
TRB	01|06	HXXA	0.251295	65.77	56.9	92	242
TRA	01|06	XXHXX	0.25166	54.89	57.88	104	258
TRA	01|06	XXXXP	0.255341	60.38	53.91	93	269
TRA	01|06	XXXAXP	0.261663	88.8	54.89	57	305
TRB	01|06	HXXHX	0.266837	153.75	56.9	102	232
TRA	01|06	XXXHX	0.27175	69.65	54.89	82	280
TRB	01|06	HXXX	0.271926	57.88	42.35	228	106
TRA	01|06	HXXA	0.273353	67.81	53.91	58	304
TRA	01|06	XXHPX	0.281406	53.91	56.9	56	306
TRB	01|06	XHHX	0.282444	60.38	52.27	73	261
TRA	01|06	XXHP	0.290722	53.91	56.9	71	291
TRB	01|06	AXXX	0.306567	57.88	53.91	57	277
TRA	01|06	NXXX	0.318118	69.65	53.91	82	280
TRA	01|06	HHXXX	0.328769	54.89	57.88	146	216
TRB	01|06	XXXNX	0.339219	56.9	54.89	57	277
TRB	01|06	HXXXX	0.339597	57.88	48.16	164	170
TRA	01|06	XAXXX	0.345182	56.44	56.9	81	281
TRB	01|06	XHXX	0.350761	57.88	45.93	138	196
TRA	01|06	XXXA	0.355964	53.91	56.9	180	182
TRA	01|06	XHPX	0.392267	45.8	57.88	68	294
TRA	01|06	XAXX	0.406535	56.44	56.9	128	234
TRA	01|06	HXXX	0.414586	54.89	57.88	236	126
TRB	01|06	XXXHX	0.415107	56.9	53.91	62	272
TRB	01|06	HXXXXX	0.423055	57.88	54.89	106	228
TRB	01|06	XXHX	0.445549	57.88	45.93	167	167
TRA	01|06	XXXXXP	0.446515	56.9	54.89	66	296
TRB	01|06	XAXN	0.457474	54.89	56.9	51	283
TRB	01|06	XXXX	0.457781	56.9	52.27	220	114
TRB	01|06	HXXN	0.460754	57.88	56.9	94	240
TRA	01|06	XXXXX	0.46528	65.77	52.27	184	178
TRA	01|06	HXXXXX	0.482999	60.38	53.91	113	249
TRA	01|06	XHXX	0.495815	54.89	57.88	168	194
TRB	01|06	HXXHH	0.496041	60.38	54.89	52	282
TRB	01|06	HXXXN	0.500334	56.9	57.88	64	270
TRB	01|06	HXXH	0.50722	53.91	57.88	169	165
TRA	01|06	HXAX	0.51381	47.93	57.88	55	307
TRA	01|06	XPXX	0.533296	210.81	56.44	64	298
TRA	01|06	XXXHP	0.533909	53.91	56.9	59	303
TRA	01|06	XXXX	0.538753	56.9	56.44	260	102
TRA	01|06	XXAXP	0.544025	56.9	54.89	71	291
TRA	01|06	XXXXA	0.546094	53.91	56.9	136	226
TRA	01|06	XXHX	0.548208	67.81	53.91	149	213
TRB	01|06	XXAXX	0.554698	57.88	56.9	51	283
TRB	01|06	XXAX	0.557198	57.88	56.9	115	219
TRA	01|06	HHXX	0.57454	54.89	57.88	195	167
TRA	01|06	XXXAP	0.577245	60.38	56.44	95	267
TRA	01|06	HHPX	0.582703	39.49	57.88	67	295
TRB	01|06	XXXAX	0.590209	57.88	54.89	57	277
TRB	01|06	XXNX	0.598972	56.9	52.27	90	244
TRA	01|06	HPXX	0.604357	37.25	57.88	66	296
TRB	01|06	XXHH	0.617622	69.65	53.91	76	258
TRB	01|06	XHXXX	0.620086	56.9	57.88	88	246
TRB	01|06	XXXH	0.62016	57.88	52.27	108	226
TRA	01|06	XXXXAP	0.620663	60.38	56.44	70	292
TRB	01|06	XXHXXX	0.623685	54.89	60.38	68	266
TRA	01|06	HHXHX	0.634314	53.91	56.9	63	299
TRA	01|06	XXAH	0.643538	48.16	57.88	55	307
TRB	01|06	NXXX	0.659685	48.16	56.9	54	280
TRB	01|06	HHXX	0.660998	56.9	65.77	76	258
TRA	01|06	AXXX	0.68178	57.88	53.91	127	235
TRB	01|06	HXXHXX	0.681933	48.16	60.38	66	268
TRA	01|06	HHHXX	0.682183	67.81	56.44	72	290
TRB	01|06	XXPXX	0.692242	54.89	57.88	57	277
TRB	01|06	XHXXXX	0.692775	88.8	56.9	52	282
TRB	01|06	XXXXXN	0.695323	54.89	57.88	57	277
TRB	01|06	XXXA	0.701193	57.88	56.9	81	253
TRA	01|06	XXAXX	0.705723	56.44	56.9	56	306
TRA	01|06	AXXXX	0.709512	67.81	54.89	74	288
TRB	01|06	XXXXXX	0.751644	42.35	65.77	78	256
TRB	01|06	XXPX	0.785128	56.9	57.88	80	254
TRA	01|06	XXXAX	0.787586	68.43	56.44	82	280
TRA	01|06	HXHXX	0.793058	65.77	56.44	63	299
TRA	01|06	HXXP	0.796564	54.89	60.38	52	310
TRA	01|06	HHXN	0.808223	52.27	56.44	59	303
TRB	01|06	XXXP	0.812974	54.89	56.9	70	264
TRB	01|06	XXXXH	0.834587	57.88	56.9	58	276
TRA	01|06	HXXXX	0.840166	54.89	57.88	177	185
TRA	01|06	XHXXH	0.845637	45.8	57.88	51	311
TRA	01|06	HHXXXX	0.856838	56.9	56.44	108	254
TRA	01|06	XXXXH	0.860221	67.81	56.44	90	272
TRA	01|06	HXHX	0.895671	65.77	56.44	87	275
TRB	01|06	HXXAX	0.896551	54.89	57.88	62	272
TRB	01|06	XPXXX	0.896949	52.27	57.88	56	278
TRA	01|06	HHHXXX	0.904782	67.81	56.44	50	312
TRA	01|06	XXAX	0.906285	56.9	54.89	143	219
TRA	01|06	PXXX	0.907841	53.91	56.9	123	239
TRA	01|06	AXXXXX	0.908268	67.81	56.44	52	310
TRA	01|06	HHXH	0.91004	56.44	54.89	96	266
TRB	01|06	PXXX	0.91326	52.27	60.38	81	253
TRA	01|06	XXXXXA	0.918109	65.77	54.89	73	289
TRA	01|06	XXAP	0.920752	67.81	54.89	108	254
TRA	01|06	XHXXXX	0.927877	69.65	56.44	61	301
TRA	01|06	XNXX	0.927981	52.27	57.88	66	296
TRB	01|06	XXHXX	0.930204	56.9	60.38	108	226
TRA	01|06	XXXAH	0.930337	53.91	56.9	51	311
TRA	01|06	XXXH	0.942291	54.89	56.44	153	209
TRA	01|06	XHXXX	0.944549	65.77	54.89	99	263
TRA	01|06	HXXXXA	0.974284	45.93	56.9	58	304
TRA	01|06	HXXH	0.974734	54.89	56.9	91	271
TRB	01|06	XPXX	0.998513	56.9	57.88	93	241
TRA	01|06	PXXXX	0.999473	48.16	56.44	85	277

## Sheet: Table S12- OV
Table SXII. CDR3 amino acid chemical sequence motifs representing survival distinctions for the eight cancer datasets in article Table 1 (OV). These data represent 100% of the analysis output with no p-values less than 0.05.
Receptor	Sample	substring	km_p_os	median_substring_os	median_no_substring_os	n_substring_os	n_no_substring_os
TRA	01|06	HXXX	0.0751752	48.72	35.41	58	65
TRA	01|06	HHXX	0.381599	47.5	36.27	51	72
TRA	01|06	XXXX	0.546642	43.5	39.39	73	50
TRB	01|06	HXXX	0.736411	34.36	48.75	59	24
